# Supplementary material for: Gestational Diabetes Mellitus Is Associated with Reduced Dynamics of Gut Microbiota during the First Half of Pregnancy
Source: PubMed Central journal article supplement (PMC7093821; doi:10.1128/msystems.00109-20), 2020-03-24

# Figure S1

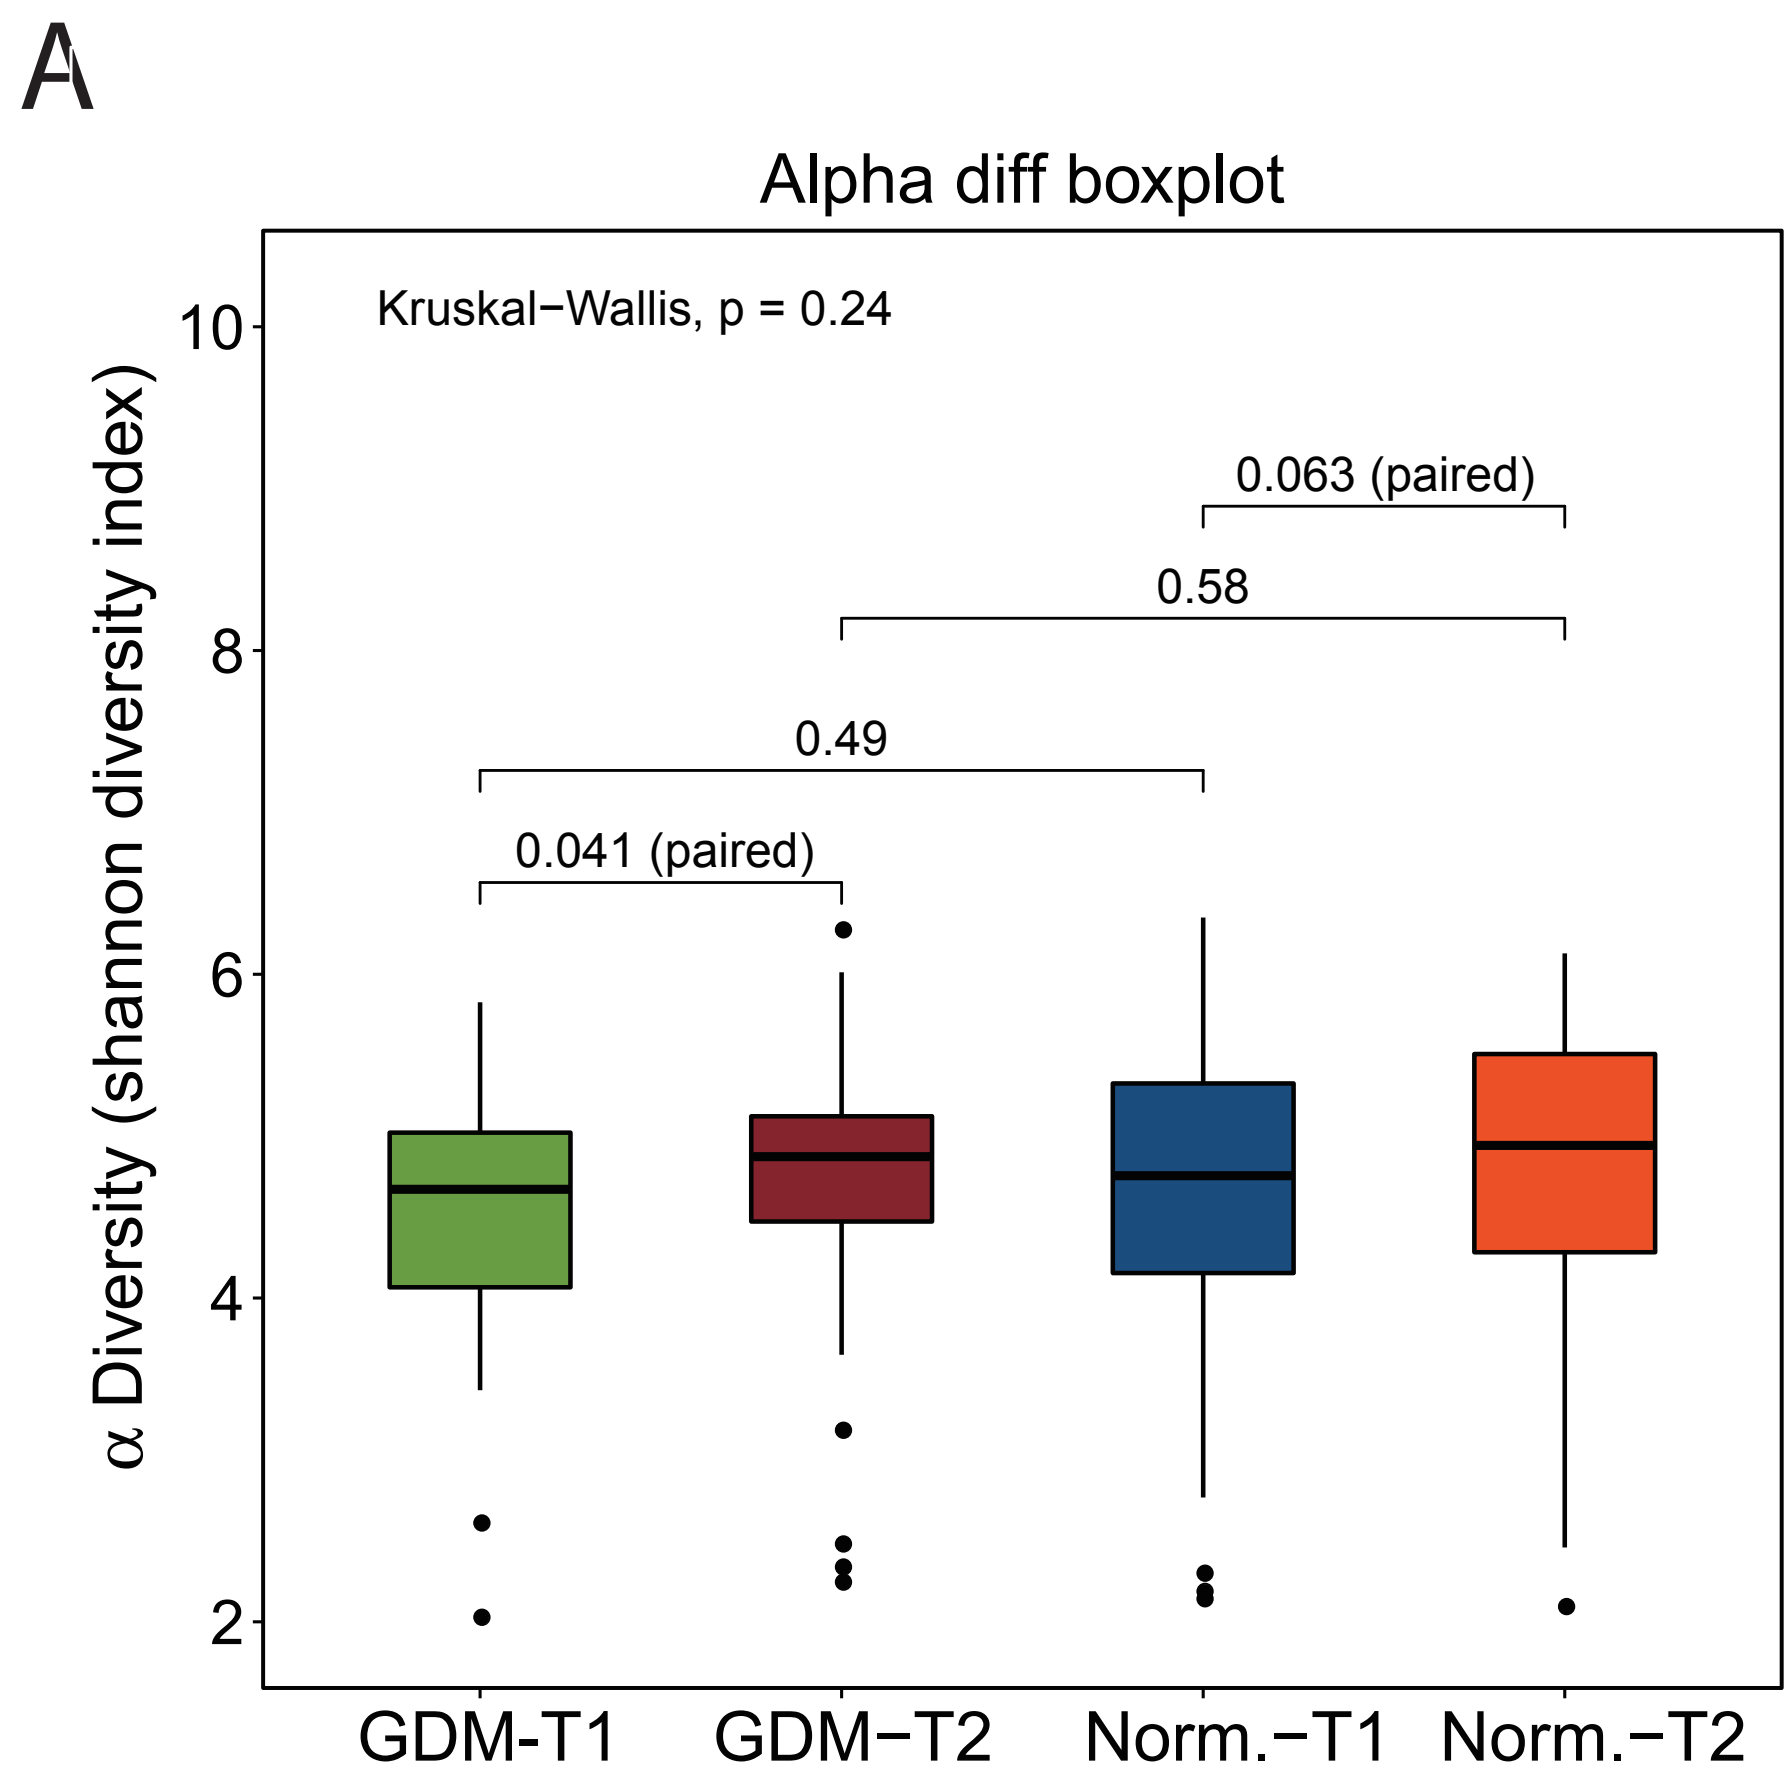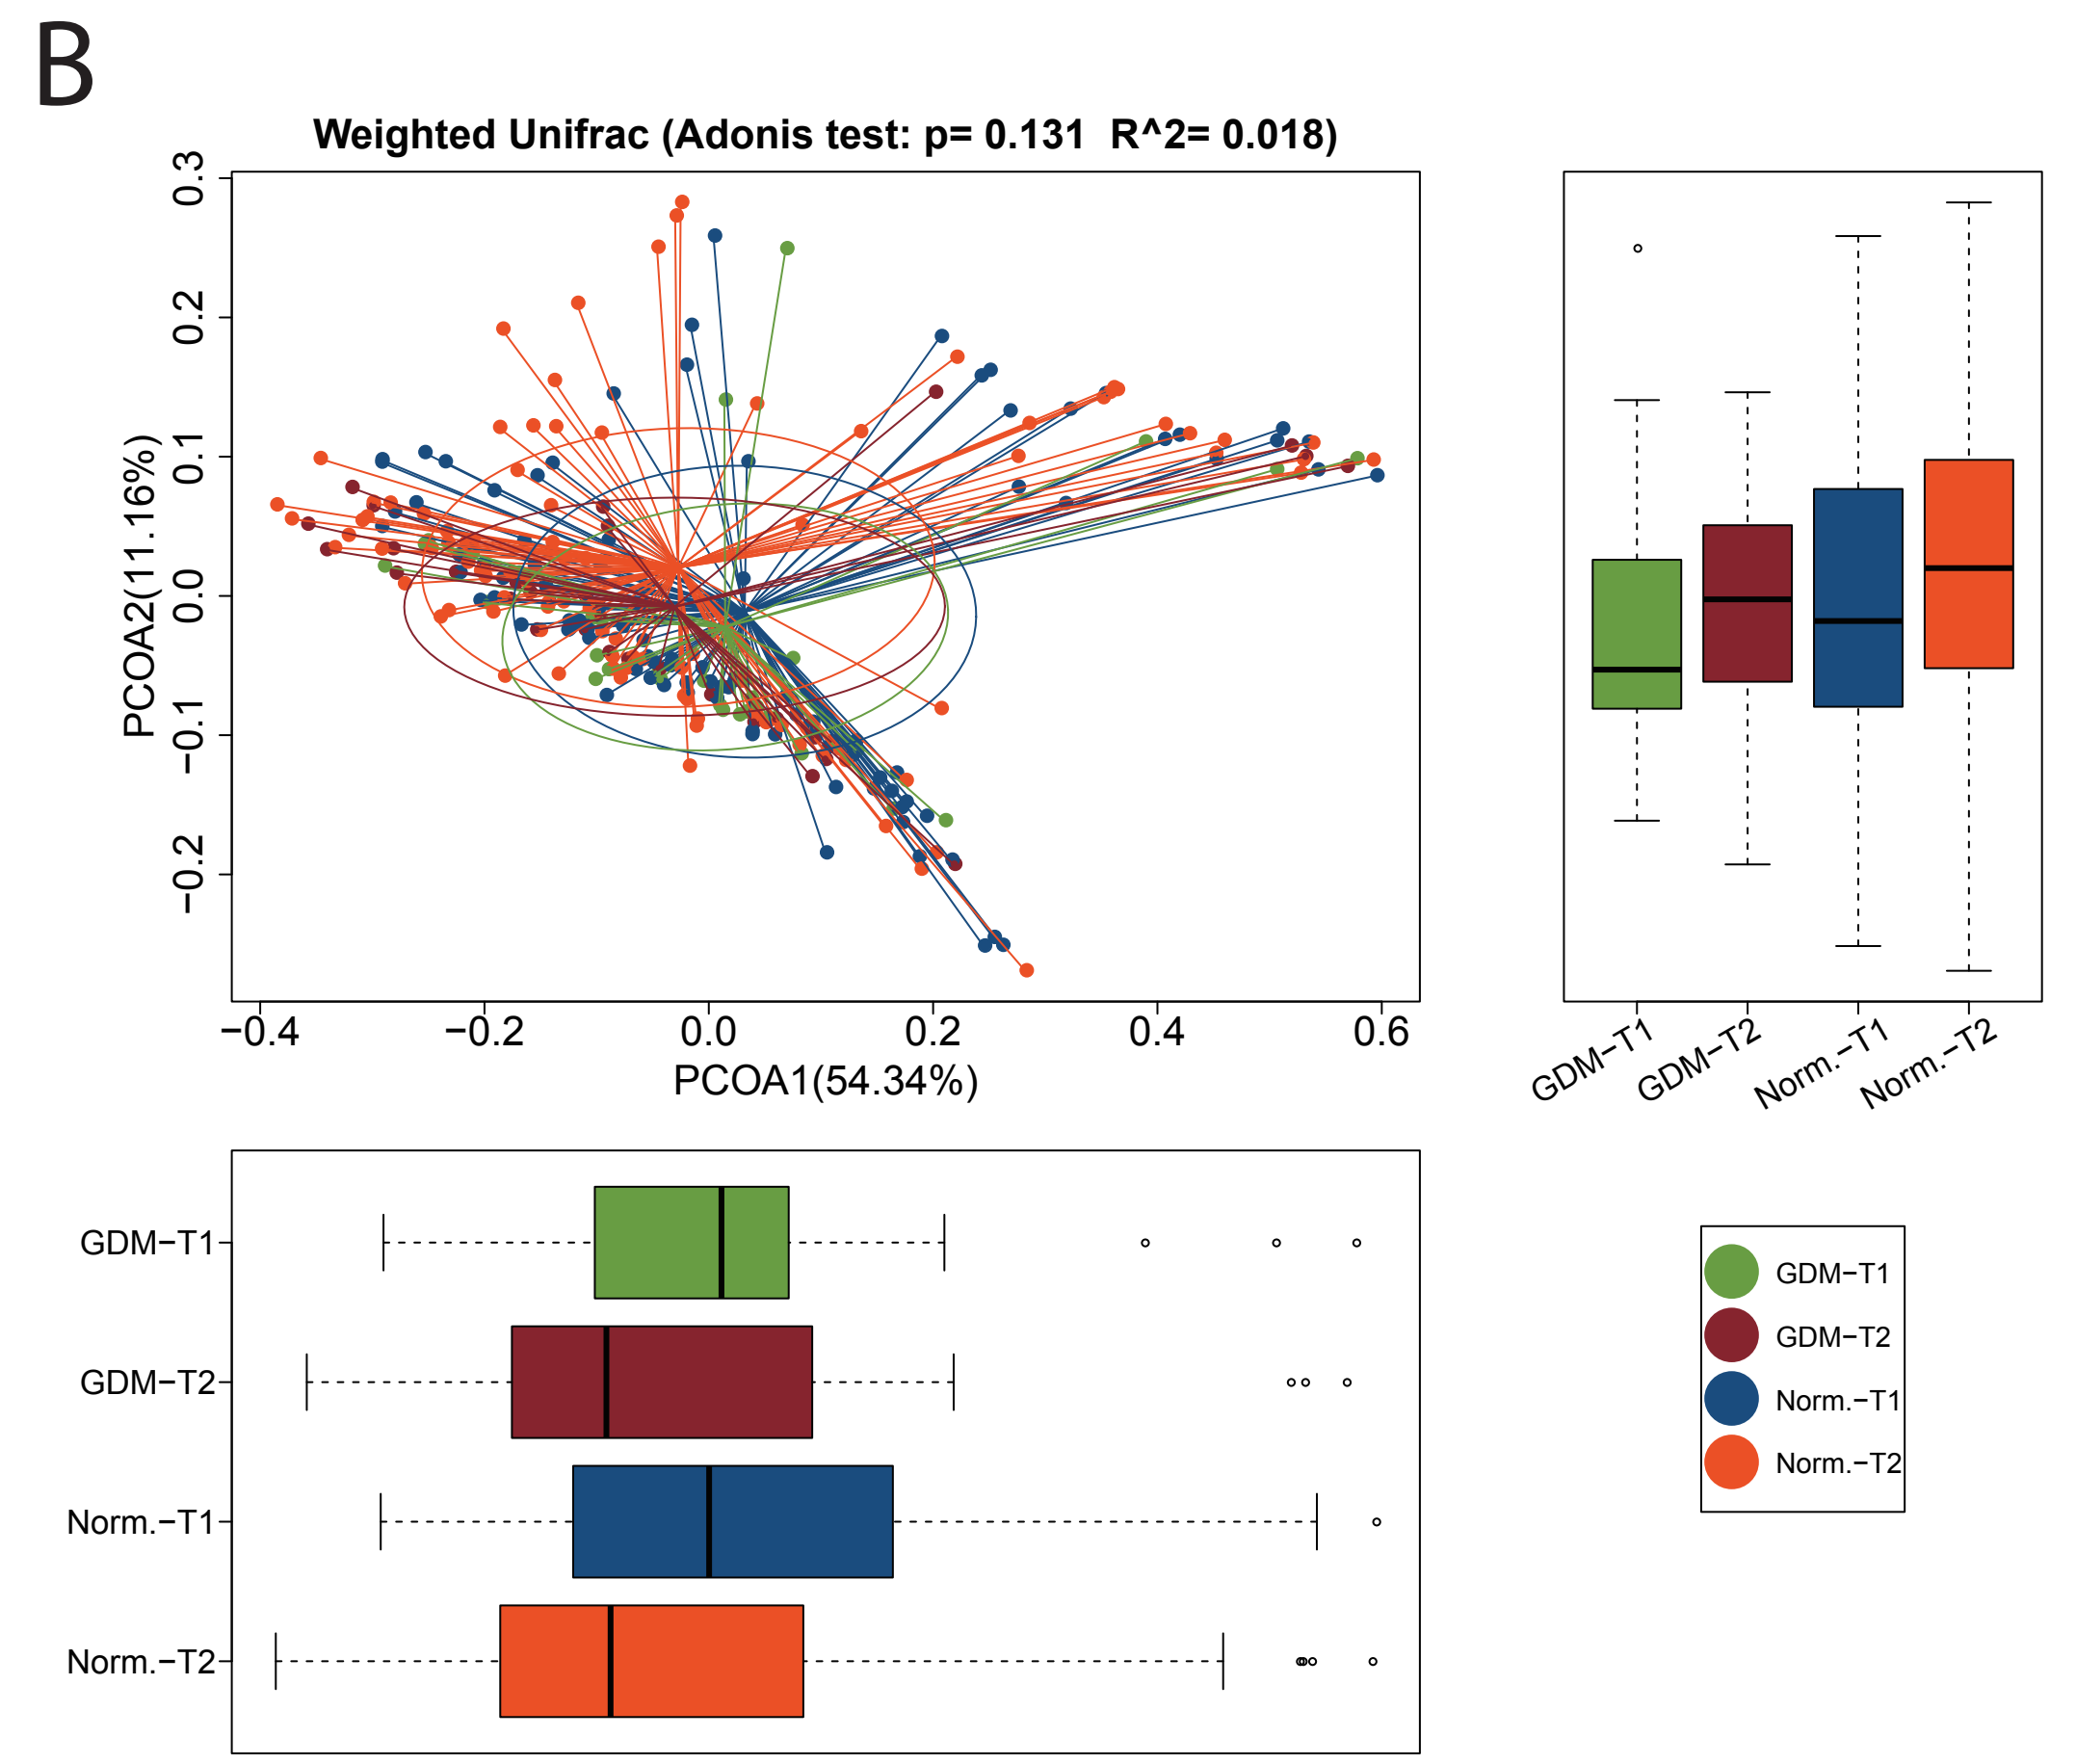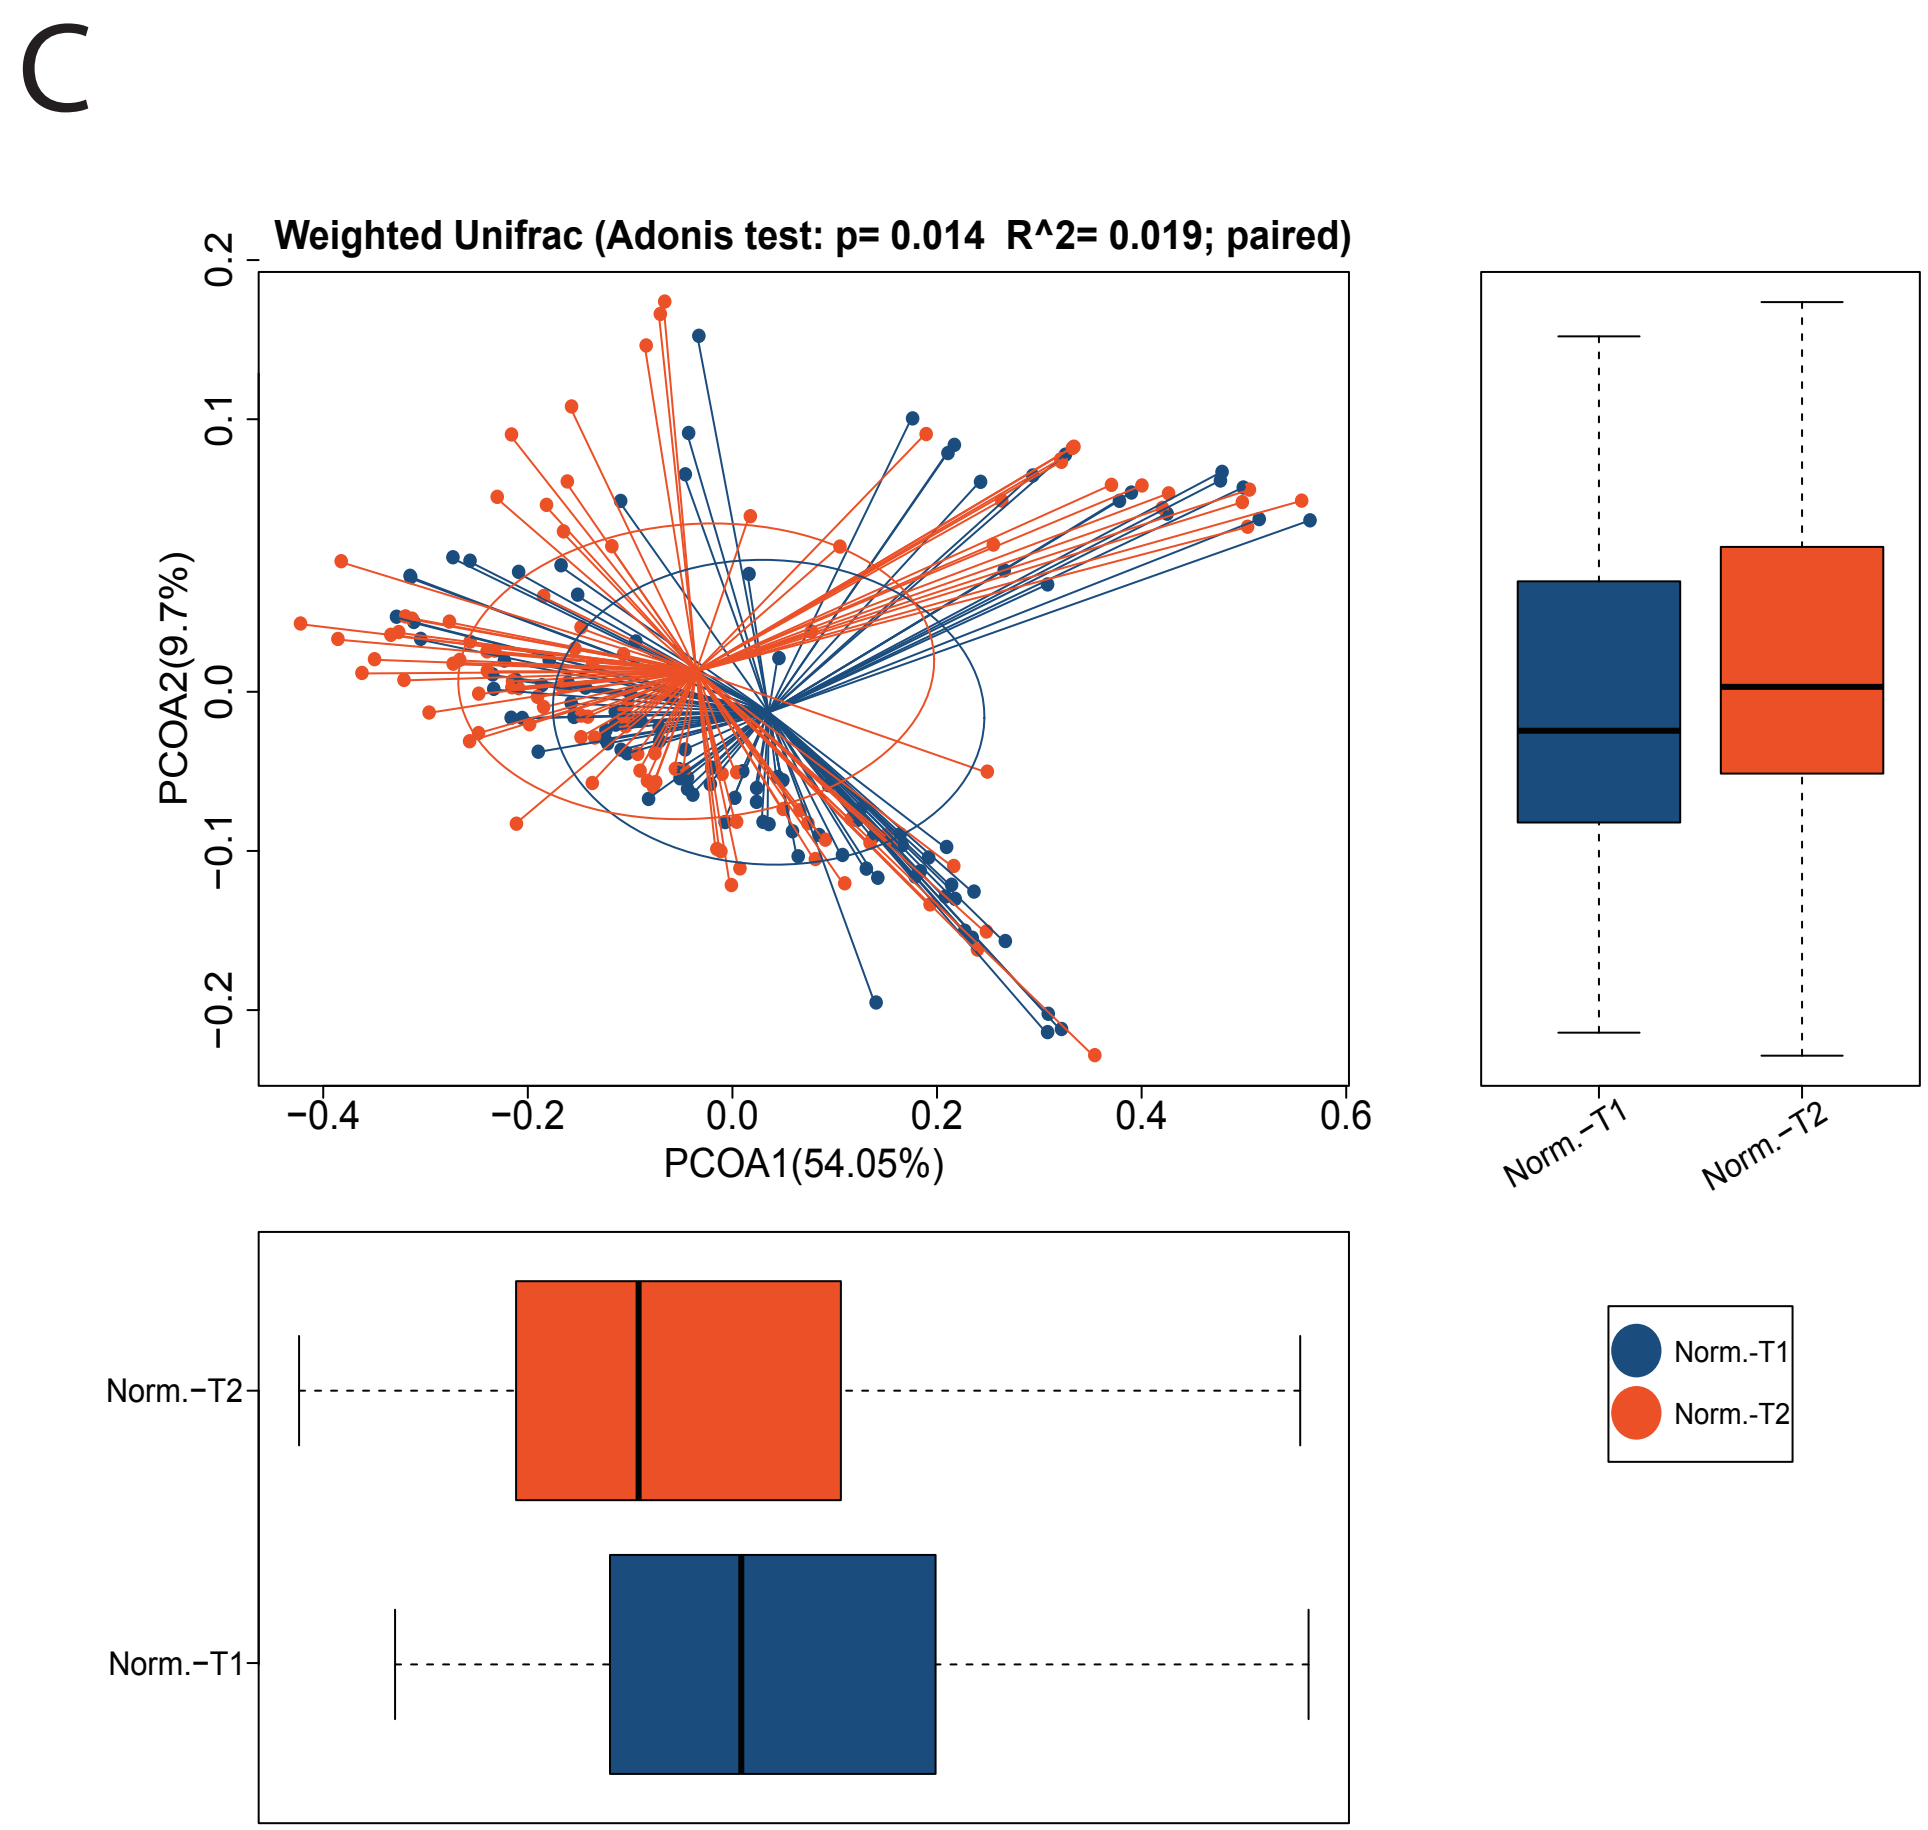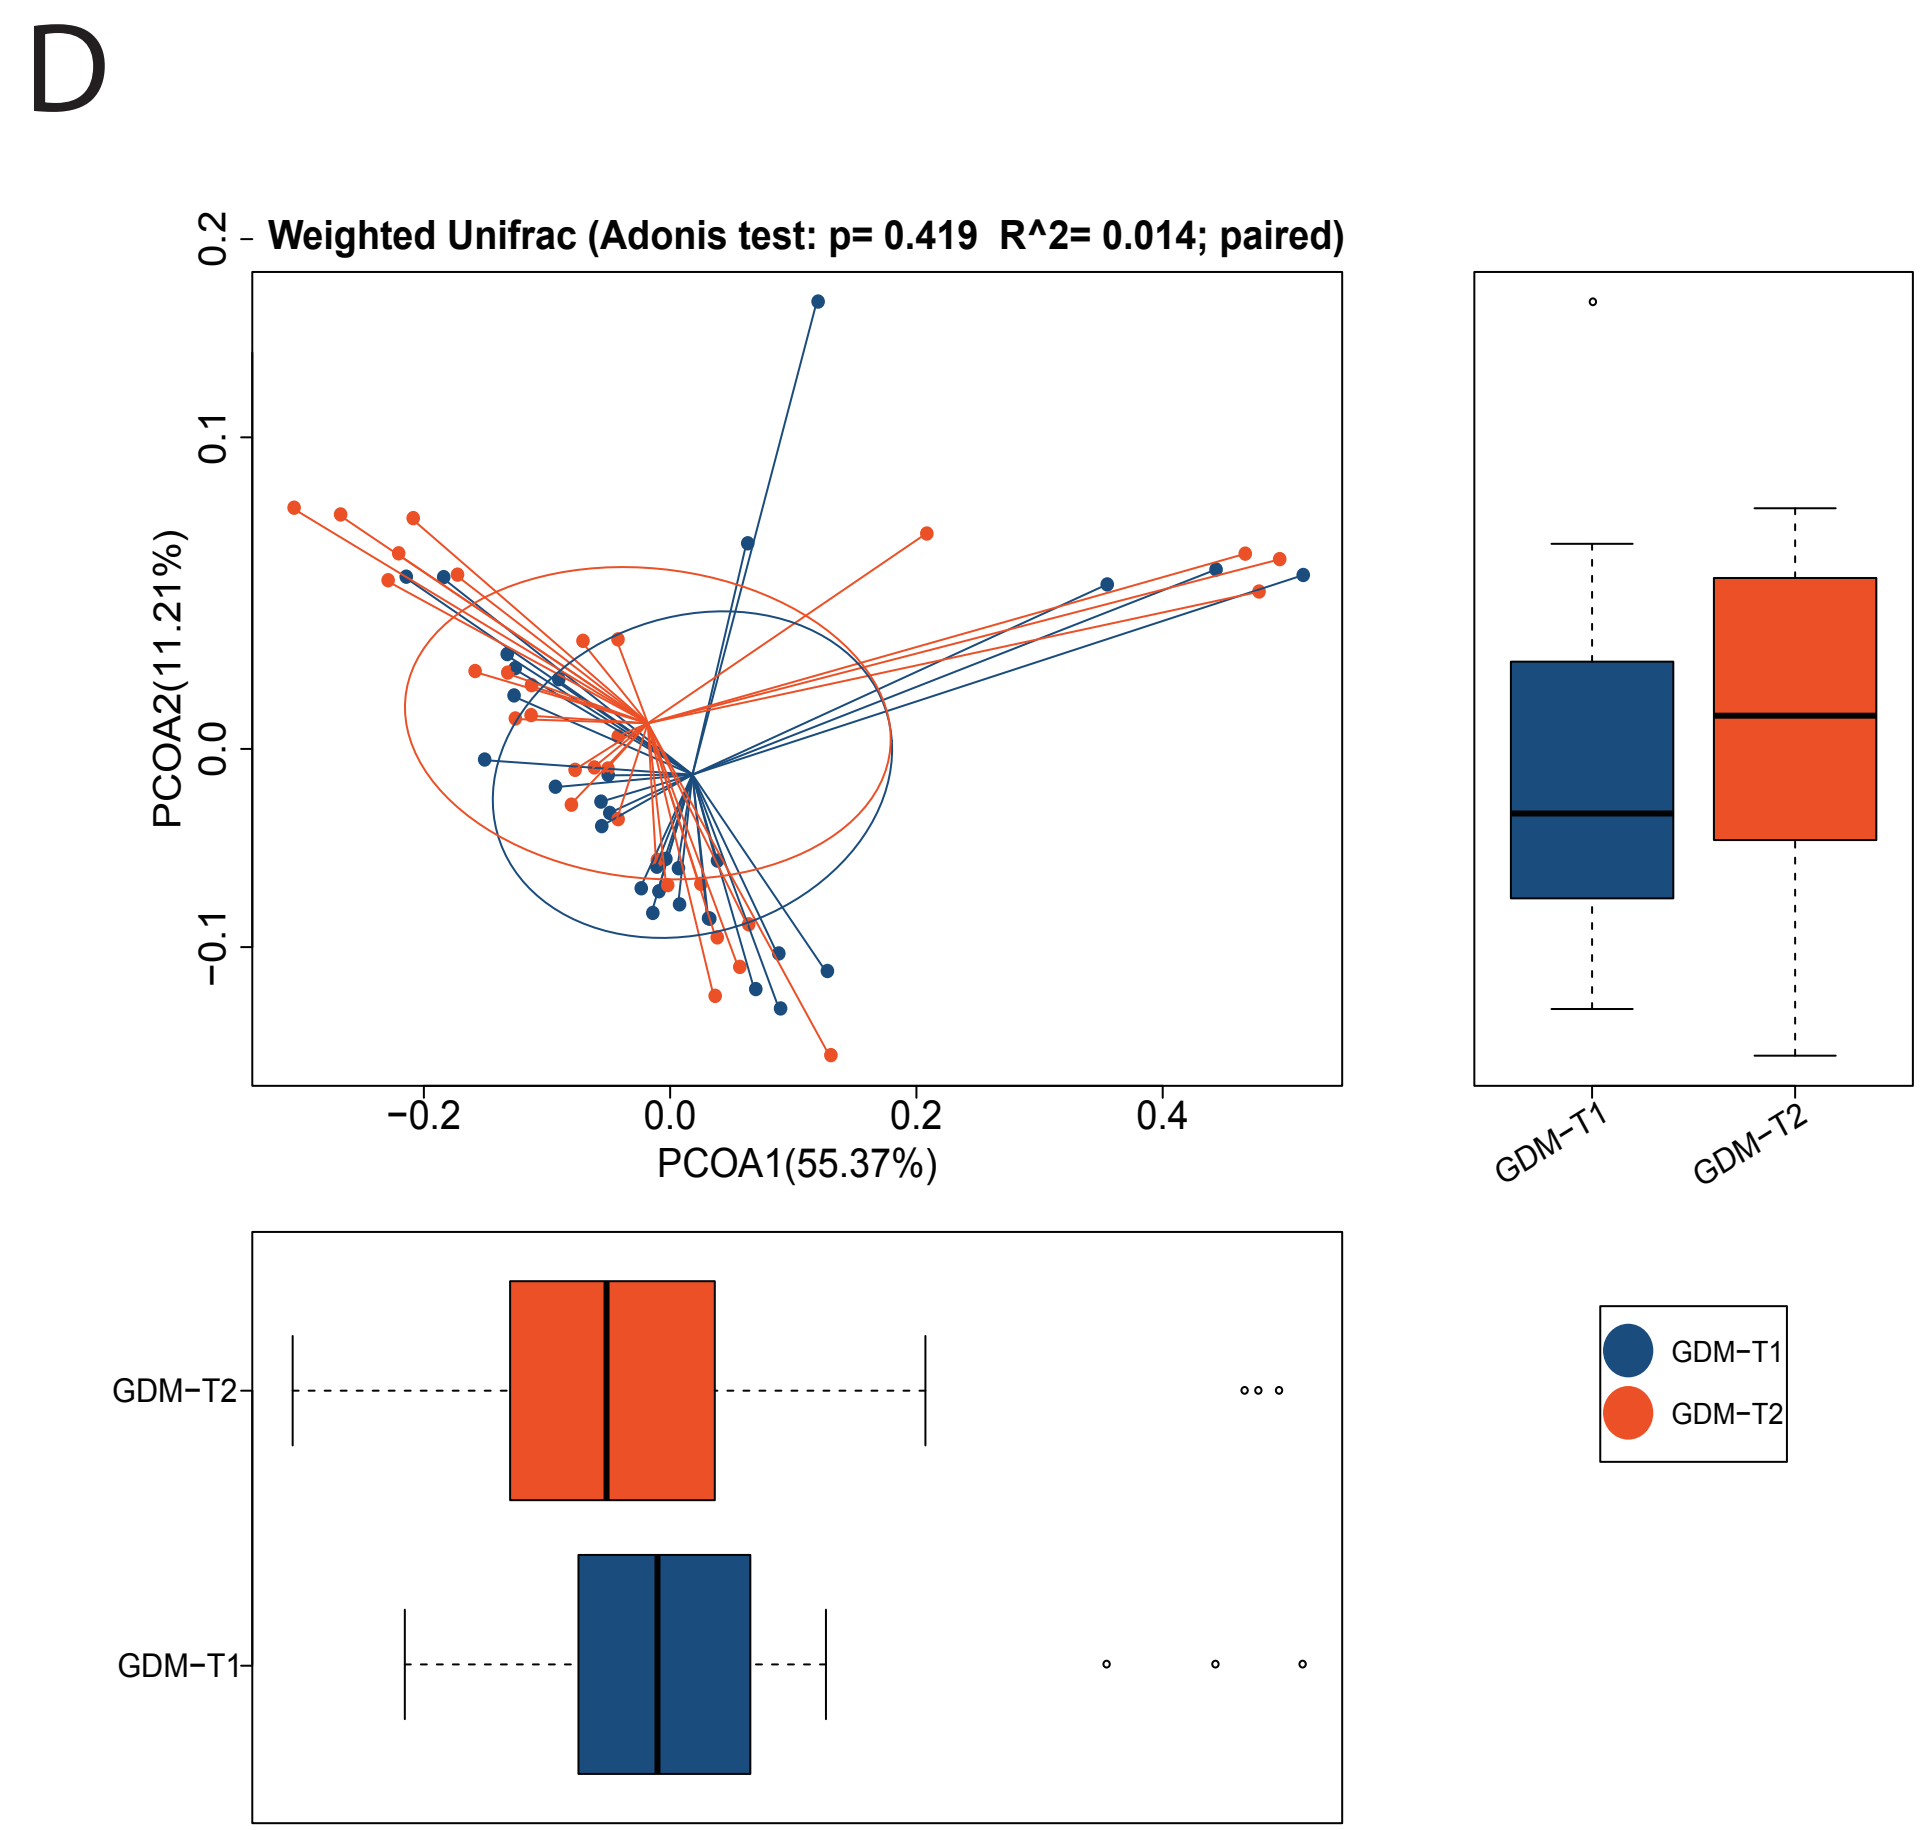

Supplement: mSystems.00109-20-sf001.pdf [file mSystems.00109-20-sf001.pdf]
